# Supplementary material for: Fabrication and Characterization of Electrospun Poly(Caprolactone)/Tannic Acid Scaffold as an Antibacterial Wound Dressing
Source: MDPI journal article supplement (doi:10.3390/polym15030593), 2023-01-24
Supplement: s1 [file s1]

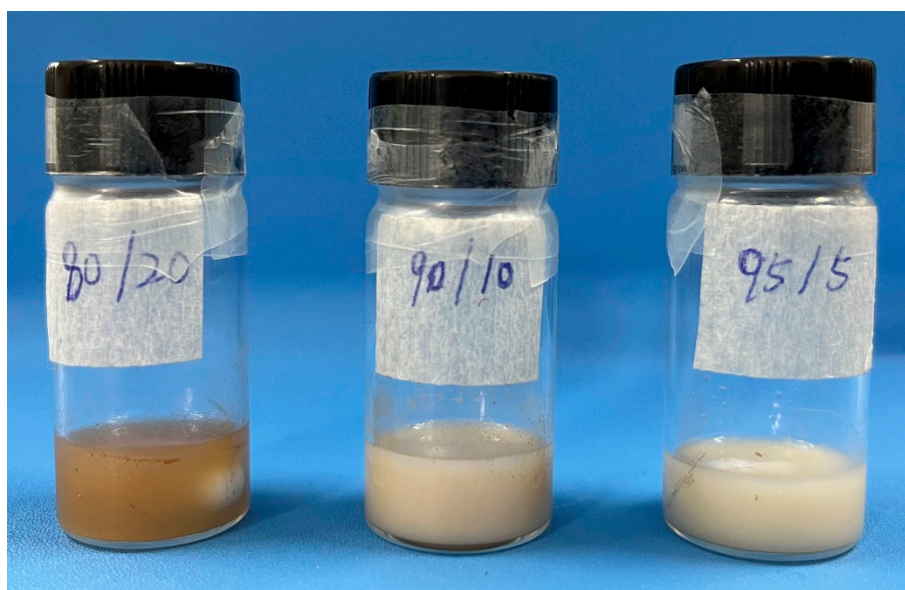

**Figure S1** The PCL/TA solution with different weight ratios (9.5:0.5, 9:1 and 8:2).

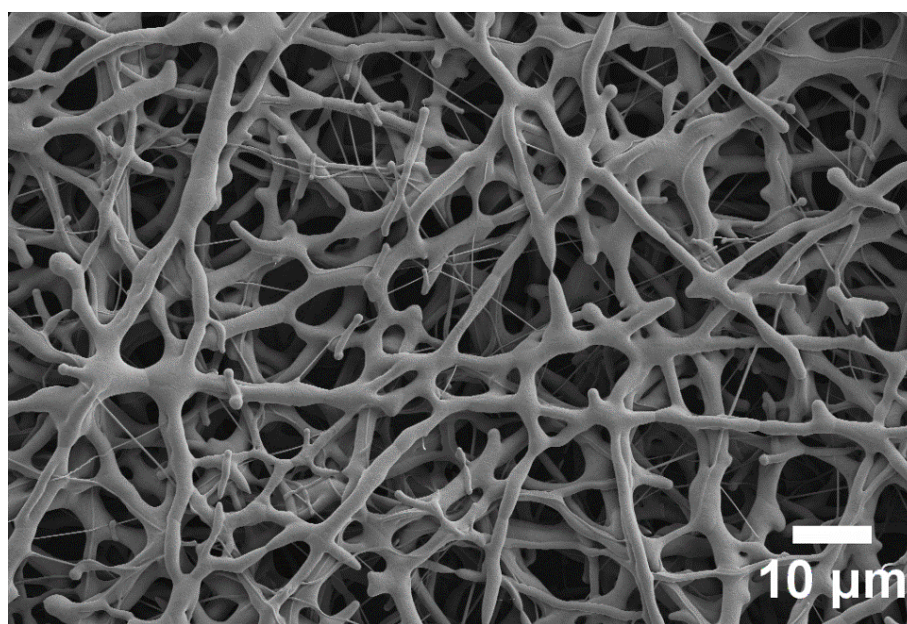

**Figure S2** SEM image of electrospun pure PCL using the HFIP alone.

**Table S1.** Water contact angle and swelling ratio of electrospun PCL and PCL/TA nanofiber scaffolds from solutions with different PCL/TA weight ratios 9.5:5 and 9:1.

| Sample           | Water contact angle (°) | Swelling ratio |
|------------------|-------------------------|----------------|
| PCL              | 127.27 ± 1.26           | 0.03 ± 0.04    |
| PCL/TA (9.5:0.5) | 84.83 ± 3.77            | 2.25 ± 0.32    |
| PCL/TA (9:1)     | 51.43 ± 7.03            | 2.73 ± 0.27    |

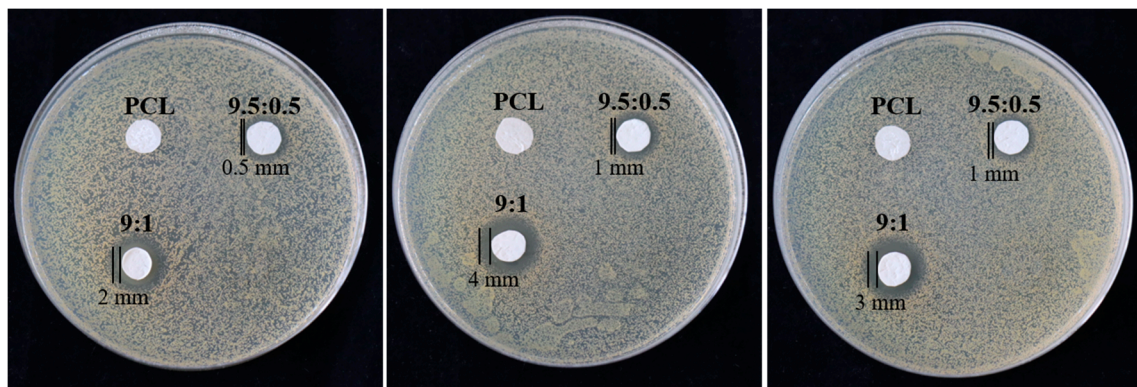

**Figure S3** Antibacterial property of PCL and PCL/TA nanofiber scaffolds from solutions with different PCL/TA weight ratios 9.5:0.5 and 9:1.
